# Supplementary material for: Combined BCL-2 and PI3K/AKT Pathway Inhibition in KMT2A-Rearranged Acute B-Lymphoblastic Leukemia Cells
Source: Int J Mol Sci. 2023 Jan 10;24(2):1359. doi: 10.3390/ijms24021359 (PMC9865387; doi:10.3390/ijms24021359)
Supplement: Supplementary file 1 [file ijms-24-01359-s001.zip]

Archive with 12 entries (12 files):
- Figure S1.jpg
- Figure S10.jpg
- Figure S2.jpg
- Figure S3.jpg
- Figure S4.jpg
- Figure S5.jpg
- Figure S6.jpg
- Figure S7.jpg
- Figure S8.jpg
- Figure S9.jpg
- Supplementary Figures caption_proofread.pdf
- Table S1.xlsx
