# Supplementary material for: Combined BCL-2 and PI3K/AKT Pathway Inhibition in KMT2A-Rearranged Acute B-Lymphoblastic Leukemia Cells
Source: Int J Mol Sci. 2023 Jan 10;24(2):1359. doi: 10.3390/ijms24021359 (PMC9865387; doi:10.3390/ijms24021359)
Supplement: Supplementary file 1 [file ijms-24-01359-s001.zip › Table S1.xlsx]

## Sheet: Tabelle1
Table S1: BBC3 gene expression fold change values compared to controls
	VEN	BKM	BKM+	IDEL	IDEL+	MK	MK+	PERI	PERI+
			VEN		VEN		VEN		VEN
SEM	1	1.07	1	1.04	1.14	1.02	1.09	3.82	3.07
RS4;11	-1.22	1.04	-1.2	-1.26	-1.58	-1.31	-1.38	-1.22	1
